# Supplementary material for: KLF4 is a key determinant in the development and progression of cerebral cavernous malformations
Source: PubMed Central journal article supplement (PMC4718159; doi:10.15252/emmm.201505433), 2015-11-26

Source data Figure 2

Panel A

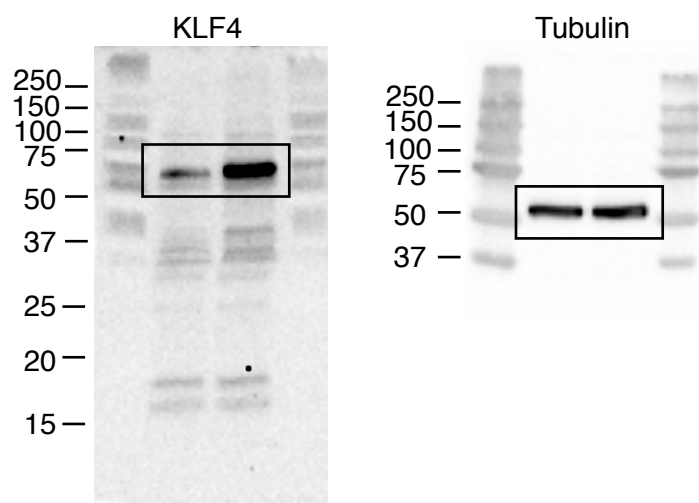

Supplement: EMMM-8-06-s003.pdf [file EMMM-8-06-s003.pdf]
