# Supplementary material for: KLF4 is a key determinant in the development and progression of cerebral cavernous malformations
Source: PubMed Central journal article supplement (PMC4718159; doi:10.15252/emmm.201505433), 2015-11-26
Supplement: EMMM-8-06-s011.pdf [file EMMM-8-06-s011.pdf]

## **KLF4 is a key determinant in the development and progression of Cerebral Cavernous Malformations**

Roberto Cuttano, Noemi Rudini, Luca Bravi, Monica Corada, Costanza Giampietro, Eleanna Papa, Marco Francesco Morini, Luigi Maddaluno, Nicolas Baeyens, Ralf H. Adams, Mukesh K. Jain, Gary K. Owens, Martin Schwartz, Maria Grazia Lampugnani and Elisabetta Dejana

*Corresponding author: Elisabetta Dejana, IFOM-FIRC Institute of Molecular Oncology*

---

**Review timeline:**

Submission date:  
Accepted:

12 May 2015  
23 October 2015

---

*Editor: Roberto Buccione*

**Transaction Report:**

No Review Process File is available with this article, as the authors have chosen not to make the review process public in this case
